# Supplementary material for: Near infrared labeling of PLGA for in vivo imaging of nanoparticles
Source: Royal Society of Chemistry journal article supplement (doi:10.1039/c2py00520d), 2012-01-01
Supplement: c2py00520d.pdf [file c2py00520d.pdf]

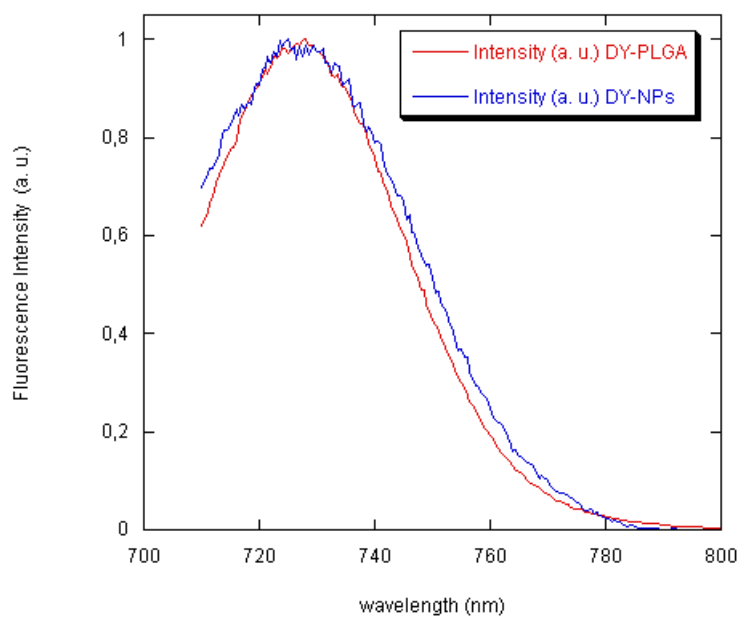

Figure S1: Fluorescent spectrum of DY-PLGA in DCM:ethanol 2:1 (v:v) (red) and DY-NPs in water (blue). The excitation wavelength was set at 700nm.
